# Supplementary material
Source: PubMed Central journal article supplement (PMC7410421)
Supplement: tpmd190653.SD1.pdf [file tpmd190653.SD1.pdf]

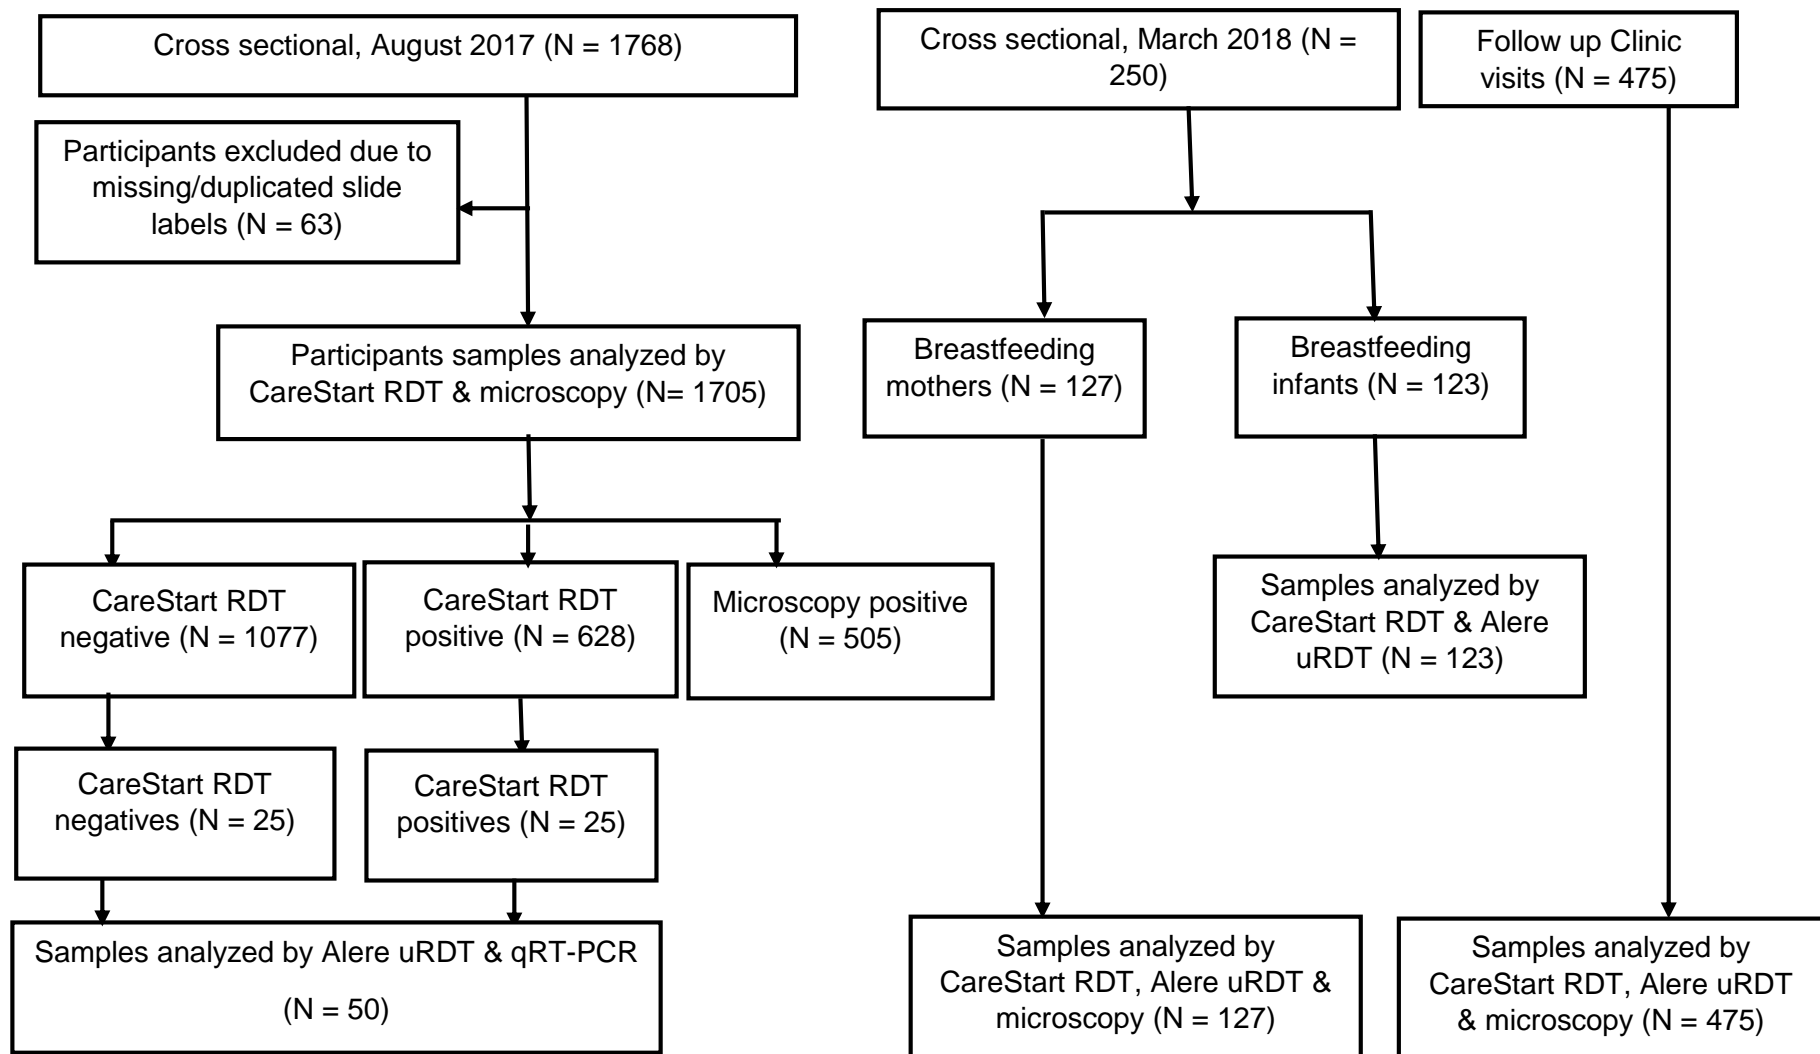

Figure 1 Sources of samples used in this study: the 50 field survey samples used for Alere RDT and qRT-PCR analysis were obtained from a cross sectional survey conducted in August 2017; mother-infant pair samples were obtained from a cross sectional study conducted in March 2018; follow up clinic visit samples were obtained from febrile children less than 5 years old visiting a malaria clinic between March-August 2018.
